# Supplementary material
Source: PubMed Central journal article supplement (PMC7300543)
Supplement: TRF-60-1773-s002.pdf [file TRF-60-1773-s002.pdf]

## 康复献浆

## 防控疫情

康复后的您，可以帮助更多的新冠患者

每一袋康复期的血浆都是挽救新冠患者的希望

### 一份血浆 一份希望

#### 众志成城，防疫抗疫

2020年，新型冠状病毒爆发，严重威胁到全球公共卫生安全。作为曾经被新型冠状病毒感染的康复人群，满怀对正在遭受新型冠状病毒感染患者的关系，对一人员的感恩，想用实际行动帮助更多的患者，捐献血浆，帮助患者抵御病毒，您也是抵御疫情的战士！

#### 什么是血浆？

血浆是血液的重要组成部分，呈淡黄色液体。血浆中，水分占90~92%，其他约10%以血浆蛋白(蛋白质)等溶质为主。献浆后丢失的水分将在几小时内恢复，血浆蛋白的恢复也很迅速，若您希望您的血浆可以帮助更多的患者，可以在2周后再次捐献血浆。

#### 您血浆的宝贵之处？

在新型冠状病毒感染人体后，人体的免疫系统会产生相应的物质来抵抗新型冠状病毒。当您康复之后，这些物质依然存在于您的血液之中，这就是抗体。将含有这类抗体的血浆输注到患者体内，这些抗体可与患者的新冠病毒结合，进而与患者自身免疫系统协调合作，清除病毒，对临床治疗有良好的治疗价值。康复期血浆已经在很多传染病防治中得到应用，安全性有很好保证。

#### 我们如何保证您的健康？

1. 我国每年有近2000万人次献浆，献浆无碍健康，并且人体抗体产生的速度很快，您献浆之后对您的免疫力无影响。
2. 献浆前医护团队将对您进行健康检查，全面评估您的身体情况，符合健康标准要求出院后两周以上，才被允许献浆。
3. 献浆是利用一次性采血采浆耗材和专业设备，将血液中的血浆成分分离出来，安全可靠。

**捐献条件：出院两周以上，携带出院小结，到武汉血液中心106室**

**您将获得“抗击新冠疫情无偿献血证”**

Fig. S2. Recruitment material in Chinese, with English translation in supplemental material.
